# Supplementary material
Source: MDPI journal article supplement (https://www.mdpi.com/2073-4441/14/1/124)
Supplement: s1 [file s1]

## Article

# Geochemical markers as a tool for the characterization of a multi-layer sub-urban aquifer: the case study of Como (northern Italy)

Gilberto Binda<sup>1,2\*</sup>, Francesca Frascoli<sup>1</sup>, Davide Spanu<sup>1</sup>, Maria Francesca Ferrario<sup>1</sup>, Silvia Terrana<sup>1</sup>, Roberto Gambillara<sup>1</sup>, Sara Trotta<sup>1</sup>, Paula J. Noble<sup>3,4</sup>, Franz A. Livio<sup>1</sup>, Andrea Pozzi<sup>1</sup>, Alessandro Maria Michetti<sup>1,5</sup>

<sup>1</sup> Dipartimento di Scienza e Alta Tecnologia, Università dell'Insubria, Via Valleggio 11, 22100 Como, Italy; gilberto.binda@uninsubria.it (G.B.); francesca.frascoli@gmail.com (F.F.); d.spanu1@uninsubria.it (D.S.); francesca.ferrario@uninsubria.it (M.F.F.); silvia.terrana@uninsubria.it (S.T.); roberto.gambillara@uninsubria.it (R.G.); strotta@studenti.uninsubria.it (S.T.); franz.livio@uninsubria.it (F.A.L.); andrea.pozzi@uninsubria.it (A.P.); alessandro.michetti@uninsubria.it (A.M.M.)

<sup>2</sup> Norwegian Institute for Water Research (NIVA), Gaustadalléen 21, 0349 Oslo, Norway

<sup>3</sup> Department of Geological Sciences and Engineering, University of Nevada, Reno, NV 89557, USA; noblepj@unr.edu

<sup>4</sup> Global Water Center, University of Nevada, Reno, NV 89557, USA

<sup>5</sup> Istituto Nazionale di Geofisica e Vulcanologia, Napoli, Italy

**Citation:** Binda, G.; Frascoli, F.; Spanu, D.; Ferrario, M.F.; Terrana, S.; Gambillara, R.; Trotta, S.; Noble, P.J.; Livio, F.A.; Pozzi, A.; Michetti, A.M. Geochemical Markers as a Tool for the Characterization of a Multi-Layer Urban Aquifer: The Case Study of Como (Northern Italy). *Water* **2022**, *14*, 124. <https://doi.org/10.3390/w14010124>

\* Correspondence: gilberto.binda@uninsubria.it (if there are multiple corresponding authors, add author initials)

Academic Editor: Albert Casas Ponsati

Received: 16 November 2021

Accepted: 28 December 2021

Published: 5 January 2022

**Publisher's Note:** MDPI stays neutral with regard to jurisdictional claims in published maps and institutional affiliations.

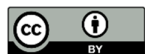

**Copyright:** © 2022 by the authors. Licensee MDPI, Basel, Switzerland. This article is an open access article distributed under the terms and conditions of the Creative Commons Attribution (CC BY) license (<http://creativecommons.org/licenses/by/4.0/>).

## Supplementary material

### Tables S1-S4

### Figure S1

**Table S1.** Location and type of water sampled in different sampling points.

| Site         | Easting (UTM 32N) | Northing (UTM 32N) | Elevation of ground level | Well screen m from ground level | Sampled aquifer |
|--------------|-------------------|--------------------|---------------------------|---------------------------------|-----------------|
| measure unit | m                 | m                  | m a.s.l.                  |                                 | -               |
| CC2          | 511266            | 5071996            | 408.5                     | -                               | Surface water   |
| CC1          | 511803            | 5072232            | 457                       | -                               | Surface water   |
| CC3          | 507681            | 5072383            | 230                       | -                               | Surface water   |
| S1           | 506346            | 5073366            | 199.2                     | 12.50-15.50                     | Shallow aquifer |
| S2           | 506345            | 5073367            | 199.2                     | 2-5                             | Shallow aquifer |
| S3           | 506172            | 5073235            | 199.3                     | 2-10                            | Shallow aquifer |
| S4           | 506008            | 5073219            | 200.9                     | 2-10                            | Shallow aquifer |
| S5           | 505920            | 5073217            | 200.6                     | 2-10                            | Shallow aquifer |
| S6           | 506038            | 5073265            | 199.5                     | 2-10                            | Shallow aquifer |
| S7           | 505942            | 5073258            | 200.3                     | 2-5                             | Shallow aquifer |
| D1           | 506331            | 5072575            | 202.4                     | 97-98                           | Deep aquifer    |
| D2           | 506568            | 5073200            | 200.3                     | 66.5-70                         | Deep aquifer    |
| L1           | 506409            | 5073473            | 200                       | -                               | Surface water   |

**Table S2.** Physicochemical parameters and major ion data of all water samples, including ion balance.

| Sample<br>measure unit | Date<br>-  | Li<br>µg/L | V<br>µg/L | Mn<br>µg/L | Co<br>µg/L | Ni<br>µg/L | As<br>µg/L | Rb<br>µg/L | Sr<br>µg/L | U<br>µg/L | Cd<br>µg/L | Pb<br>µg/L | Ag<br>µg/L | δD <sub>VSMOW</sub><br>‰ | δ <sup>18</sup> O <sub>VSMOW</sub><br>‰ |
|------------------------|------------|------------|-----------|------------|------------|------------|------------|------------|------------|-----------|------------|------------|------------|--------------------------|-----------------------------------------|
| CC2-May                | 03/05/2015 | 0.405      | 0.307     | <LOD       | <LOD       | 0.121      | 0.324      | 0.457      | 185.67     | 0.139     | <LOD       | <LOD       | <LOD       | -8.22                    | -55.4                                   |
| CC2-October            | 04/10/2015 | 0.536      | 0.751     | 0.183      | 0.081      | 0.929      | 1.372      | 1.251      | 308.399    | 0.554     | 0.062      | 0.067      | 0.025      | -7.97                    | -53.5                                   |
| CC2-<br>November       | 10/11/2015 | 0.76       | 0.916     | 0.203      | 0.092      | 1.105      | 1.618      | 1.585      | 361.532    | 0.728     | 0.066      | 0.115      | 0.025      | -                        | -                                       |
| CC1-May                | 03/05/2015 | 0.13       | 0.123     | 0.11       | <LOD       | <LOD       | <LOD       | 0.145      | 142.464    | 0.026     | <LOD       | <LOD       | <LOD       | -8.18                    | -54.6                                   |
| CC1-October            | 04/10/2015 | <LOD       | 0.326     | 0.778      | 0.069      | 0.235      | 0.261      | 0.462      | 190.326    | 0.229     | <LOD       | 0.064      | 0.025      | -7.79                    | -50.1                                   |
| CC1-<br>November       | 10/11/2015 | <LOD       | 0.324     | 0.694      | 0.06       | 0.263      | 0.316      | 0.565      | 208.308    | 0.224     | 0.054      | 0.068      | 0.025      | -                        | -                                       |
| CC3-May                | 03/05/2015 | 1.229      | 0.822     | 0.949      | <LOD       | 0.635      | 2.61       | 0.977      | 308.736    | 1.212     | <LOD       | 0.015      | <LOD       | -8.27                    | -55.3                                   |
| CC3-October            | 04/10/2015 | 1.303      | 1.17      | 1.241      | 0.172      | 1.309      | 4.538      | 1.294      | 364.353    | 2.073     | 0.056      | 0.107      | 0.025      | -7.81                    | -52.8                                   |
| CC3-<br>November       | 10/11/2015 | 1.6        | 1.09      | 0.791      | 0.198      | 1.445      | 4.796      | 1.382      | 397.596    | 2.602     | 0.059      | 0.109      | 0.024      | -                        | -                                       |
| S1-May                 | 03/05/2015 | 1.923      | 0.124     | 333.64     | 0.91       | 6.123      | 23.638     | 10.382     | 409.532    | 0.448     | <LOD       | 0.88       | <LOD       | -8.55                    | -58.6                                   |
| S1-November            | 10/11/2015 | 2.416      | 0.562     | 419.929    | 0.559      | 6.723      | 28.076     | 9.179      | 294.028    | 0.344     | 0.109      | <LOD       | -0.095     | -                        | -                                       |
| S2-May                 | 03/05/2015 | 0.468      | 0.013     | 114.973    | 0.004      | 6.783      | 1.668      | 4.664      | 372.144    | <LOD      | <LOD       | <LOD       | <LOD       | -8.43                    | -58.1                                   |
| S2-October             | 04/10/2015 | 0.511      | 0.187     | 79.42      | 0.137      | 3.4        | 1.529      | 5.898      | 381.054    | 0.122     | <LOD       | 0.292      | 0.025      | -8.94                    | -62.2                                   |
| S2-November            | 10/11/2015 | 0.523      | 0.024     | 53.166     | 0.026      | 2.753      | 0.138      | 3.249      | 227.179    | 0.059     | 0.107      | <LOD       | <LOD       | -                        | -                                       |
| S3-5                   | 02/05/2015 | 1.324      | 0.774     | 164.524    | 0.126      | 3.403      | 0.202      | 14.585     | 315.699    | <LOD      | <LOD       | <LOD       | <LOD       | -9.01                    | -61.8                                   |
| S3-October             | 05/10/2015 | 1.506      | 1.464     | 167.471    | 0.571      | 3.715      | 6.026      | 14.027     | 346.201    | 0.339     | <LOD       | 0.57       | 0.025      | -7.44                    | -52.8                                   |
| S3-November            | 10/11/2015 | 1.624      | 0.45      | 172.274    | 0.132      | 3.293      | <LOD       | 16.095     | 254.838    | 0.033     | 0.107      | <LOD       | <LOD       | -                        | -                                       |
| S4-May                 | 02/05/2015 | 0.104      | 0.054     | 47.094     | 0.008      | 1.395      | 1.712      | 2.155      | 290.709    | <LOD      | <LOD       | <LOD       | <LOD       | -8.68                    | -59.7                                   |
| S4-October             | 05/10/2015 | 0.62       | 0.247     | 338.385    | 0.147      | 1.229      | 2.387      | 7.312      | 390.038    | 0.068     | 0.05       | 0.04       | 0.025      | -7.79                    | -54.5                                   |
| S4-November            | 11/11/2015 | 0.495      | 0.125     | 247.3      | 0.054      | 0.586      | 0.977      | 4.501      | 238.035    | 0.019     | 0.107      | <LOD       | <LOD       | -                        | -                                       |
| S5-May                 | 02/05/2015 | 0.205      | 0.556     | 82.37      | 0.191      | 2.048      | 3.096      | 2.396      | 341.364    | 0.219     | <LOD       | <LOD       | <LOD       | -8.83                    | -60.4                                   |
| S5-October             | 05/10/2015 | 0.276      | 2.649     | 0.071      | 0.118      | 1.592      | 21.517     | 1.159      | 423.167    | 1.414     | 0.053      | 0.004      | 0.025      | -8.55                    | -57.5                                   |
| S5-November            | 11/11/2015 | 0.347      | 1.242     | 62.417     | 0.707      | 2.275      | 26.377     | 0.999      | 250.165    | 0.793     | 0.118      | <LOD       | <LOD       | -                        | -                                       |
| S6-May                 | 02/05/2015 | 1.522      | 1.106     | 151.291    | 0.273      | 0.803      | 7.134      | 6.322      | 388.759    | 0.269     | <LOD       | 0.368      | <LOD       | -8.95                    | -61.8                                   |

|                          |            |       |       |         |       |       |         |       |         |       |       |       |       |       |       |
|--------------------------|------------|-------|-------|---------|-------|-------|---------|-------|---------|-------|-------|-------|-------|-------|-------|
| S6-October               | 05/10/2015 | 1.163 | 2.072 | 45.65   | 0.383 | 0.162 | 4.129   | 2.482 | 232.974 | 0.613 | 0.114 | <LOD  | <LOD  | -8.82 | -63.1 |
| S6-November              | 11/11/2015 | 0.8   | 1.548 | 25.854  | 0.102 | 0.746 | 7.288   | 2.02  | 223.279 | 0.443 | 0.061 | 0.139 | 0.025 | -     | -     |
| S7-May                   | 02/05/2015 | 0.156 | 0.306 | 210.779 | 0.031 | 1.205 | 1.271   | 2.552 | 379.041 | <LOD  | <LOD  | <LOD  | <LOD  | -8.83 | -60.9 |
| S7-October               | 05/10/2015 | 0.76  | 0.384 | 251.445 | 0.346 | 1.483 | 2.021   | 6.27  | 390.367 | 0.095 | <LOD  | 0.225 | 0.025 | -9.09 | -62.2 |
| S7-November              | 11/11/2015 | 0.398 | 0.293 | 173.102 | 0.051 | 0.807 | <LOD    | 3.599 | 254.244 | 0.026 | 0.107 | <LOD  | <LOD  | -     | -     |
| D1-May                   | 02/05/2015 | 2.106 | 0.002 | 9.872   | 0.016 | 0.326 | 175.847 | 1.066 | 411.028 | 0.046 | <LOD  | 0.31  | <LOD  | -8.39 | -55.2 |
| D1-October               | 05/10/2015 | 2.152 | 0.078 | 12.871  | 0.062 | 0.374 | 233.177 | 1.551 | 447.582 | 0.108 | 0.057 | 0.043 | 0.025 | -7.89 | -53.9 |
| D1-November              | 11/11/2015 | 1.944 | <LOD  | 8.577   | <LOD  | <LOD  | 166.019 | 0.964 | 289.594 | 0.046 | 0.108 | <LOD  | <LOD  | -     | -     |
| D2-May                   | 02/05/2015 | 2.055 | <LOD  | 8.689   | 0.008 | 0.007 | 105.11  | 1.399 | 452.427 | 0.058 | <LOD  | 0.109 | <LOD  | -8.3  | -54.5 |
| D2-October               | 05/10/2015 | 2.019 | 0.136 | 10.945  | 0.048 | 0.815 | 101.447 | 1.401 | 445.411 | 0.095 | <LOD  | 0.069 | <LOD  | -8.25 | -54.5 |
| D2-November              | 11/11/2015 | 2.296 | <LOD  | 9.249   | <LOD  | <LOD  | 96.615  | 1.356 | 372.855 | 0.051 | 0.108 | <LOD  | <LOD  | -     | -     |
| L1-May                   | 20/05/2021 | 2.31  | 0.999 | 2.745   | 0.663 | 1.81  | 5.089   | 2.905 | 200.496 | 1.68  | <LOD  | 0.11  | <LOD  | -     | -     |
| L1-October               | 10/10/2020 | 1.167 | 0.158 | 0.03    | <LOD  | 1.489 | 3.652   | 1.721 | 164.21  | 0.746 | <LOD  | 0.05  | <LOD  | -     | -     |
| Limit of detection (LOD) | -          | 0.005 | 0.005 | 0.015   | 0.004 | 0.007 | 0.042   | 0.008 | 0.092   | 0.005 | 0.008 | 0.024 | 0.013 | -     | -     |

**Table S3.** Trace element concentration and isotopic values of all water samples.

| Sample<br>measure unit | Date<br>-  | Li<br>µg/L | V<br>µg/L | Mn<br>µg/L | Co<br>µg/L | Ni<br>µg/L | As<br>µg/L | Rb<br>µg/L | Sr<br>µg/L | U<br>µg/L | δD <sub>VSMOW</sub><br>‰ | δ <sup>18</sup> O <sub>VSMOW</sub><br>‰ |
|------------------------|------------|------------|-----------|------------|------------|------------|------------|------------|------------|-----------|--------------------------|-----------------------------------------|
| CC2-May                | 03/05/2015 | 0.4046     | 0.3073    | <LOD       | <LOD       | 0.1214     | 0.3243     | 0.457      | 185.6698   | 0.1391    | -8.22                    | -55.4                                   |
| CC2-October            | 04/10/2015 | 0.5358     | 0.7506    | 0.1828     | 0.0812     | 0.9289     | 1.3719     | 1.2514     | 308.3987   | 0.5537    | -7.97                    | -53.5                                   |
| CC2-November           | 10/11/2015 | 0.7602     | 0.916     | 0.2033     | 0.0922     | 1.1052     | 1.6182     | 1.5854     | 361.5323   | 0.7284    | -                        | -                                       |
| CC1-May                | 03/05/2015 | 0.1296     | 0.1232    | 0.1101     | <LOD       | <LOD       | <LOD       | 0.1447     | 142.4643   | 0.026     | -8.18                    | -54.6                                   |
| CC1-October            | 04/10/2015 | <LOD       | 0.3257    | 0.778      | 0.0686     | 0.2349     | 0.2605     | 0.4618     | 190.3258   | 0.2286    | -7.79                    | -50.1                                   |
| CC1-November           | 10/11/2015 | <LOD       | 0.3239    | 0.6944     | 0.0604     | 0.263      | 0.3157     | 0.5654     | 208.3084   | 0.2244    | -                        | -                                       |
| CC3-May                | 03/05/2015 | 1.2292     | 0.8217    | 0.9494     | <LOD       | 0.6352     | 2.6104     | 0.9769     | 308.7358   | 1.2119    | -8.27                    | -55.3                                   |
| CC3-October            | 04/10/2015 | 1.303      | 1.1698    | 1.241      | 0.1723     | 1.3092     | 4.5381     | 1.2942     | 364.3525   | 2.0725    | -7.81                    | -52.8                                   |
| CC3-November           | 10/11/2015 | 1.6001     | 1.0898    | 0.7913     | 0.1981     | 1.4449     | 4.7955     | 1.3816     | 397.5956   | 2.6015    | -                        | -                                       |
| S1-May                 | 03/05/2015 | 1.9234     | 0.124     | 333.6398   | 0.9099     | 6.1228     | 23.6379    | 10.3823    | 409.5324   | 0.448     | -8.55                    | -58.6                                   |
| S1-November            | 10/11/2015 | 2.4162     | 0.562     | 419.9294   | 0.559      | 6.7233     | 28.0764    | 9.1787     | 294.0276   | 0.3436    | -                        | -                                       |
| S2-May                 | 03/05/2015 | 0.4684     | 0.0126    | 114.9732   | 0.0037     | 6.7827     | 1.6676     | 4.6635     | 372.1443   | <LOD      | -8.43                    | -58.1                                   |
| S2-October             | 04/10/2015 | 0.511      | 0.1871    | 79.4202    | 0.1373     | 3.3998     | 1.5287     | 5.8981     | 381.0538   | 0.122     | -8.94                    | -62.2                                   |
| S2-November            | 10/11/2015 | 0.5225     | 0.0235    | 53.1657    | 0.0256     | 2.7529     | 0.1384     | 3.2488     | 227.1792   | 0.0585    | -                        | -                                       |
| S3-May                 | 02/05/2015 | 1.324      | 0.7742    | 164.5236   | 0.1258     | 3.4028     | 0.2022     | 14.5845    | 315.6985   | <LOD      | -9.01                    | -61.8                                   |
| S3-October             | 05/10/2015 | 1.5064     | 1.4644    | 167.471    | 0.5709     | 3.715      | 6.0262     | 14.0272    | 346.2007   | 0.3385    | -7.44                    | -52.8                                   |
| S3-November            | 10/11/2015 | 1.6241     | 0.4497    | 172.2741   | 0.1324     | 3.2931     | <LOD       | 16.0947    | 254.838    | 0.0331    | -                        | -                                       |
| S4-May                 | 02/05/2015 | 0.1044     | 0.0543    | 47.0937    | 0.0081     | 1.395      | 1.7116     | 2.1551     | 290.7088   | <LOD      | -8.68                    | -59.7                                   |
| S4-October             | 05/10/2015 | 0.6198     | 0.2465    | 338.3847   | 0.1465     | 1.229      | 2.3865     | 7.3122     | 390.0381   | 0.0683    | -7.79                    | -54.5                                   |
| S4-November            | 11/11/2015 | 0.4947     | 0.1253    | 247.3001   | 0.0536     | 0.5855     | 0.9771     | 4.5009     | 238.0353   | 0.0187    | -                        | -                                       |
| S5-May                 | 02/05/2015 | 0.2054     | 0.5564    | 82.3701    | 0.1907     | 2.0478     | 3.0963     | 2.396      | 341.3638   | 0.2186    | -8.83                    | -60.4                                   |
| S5-October             | 05/10/2015 | 0.2756     | 2.6488    | 0.0713     | 0.1175     | 1.5923     | 21.5171    | 1.1592     | 423.167    | 1.4139    | -8.55                    | -57.5                                   |
| S5-November            | 11/11/2015 | 0.3472     | 1.2424    | 62.4173    | 0.7071     | 2.2746     | 26.3766    | 0.9986     | 250.1649   | 0.7933    | -                        | -                                       |
| S6-May                 | 02/05/2015 | 1.5224     | 1.1059    | 151.2906   | 0.273      | 0.8028     | 7.1343     | 6.3223     | 388.7593   | 0.2686    | -8.95                    | -61.8                                   |
| S6-October             | 05/10/2015 | 1.1627     | 2.072     | 45.65      | 0.383      | 0.1624     | 4.1291     | 2.4817     | 232.9742   | 0.6133    | -8.82                    | -63.1                                   |
| S6-November            | 11/11/2015 | 0.8001     | 1.5484    | 25.8543    | 0.1015     | 0.7455     | 7.2877     | 2.0203     | 223.2793   | 0.4432    | -                        | -                                       |
| S7-May                 | 02/05/2015 | 0.1562     | 0.3056    | 210.7792   | 0.0306     | 1.2054     | 1.2714     | 2.5517     | 379.0409   | <LOD      | -8.83                    | -60.9                                   |
| S7-October             | 05/10/2015 | 0.7599     | 0.3844    | 251.4454   | 0.3457     | 1.4827     | 2.0207     | 6.2696     | 390.3667   | 0.0946    | -9.09                    | -62.2                                   |

|                             |            |        |        |          |        |        |          |        |          |        |       |       |
|-----------------------------|------------|--------|--------|----------|--------|--------|----------|--------|----------|--------|-------|-------|
| S7-November                 | 11/11/2015 | 0.3982 | 0.293  | 173.1019 | 0.0505 | 0.8069 | <LOD     | 3.5987 | 254.2439 | 0.0261 | -     | -     |
| D1-May                      | 02/05/2015 | 2.106  | 0.002  | 9.8715   | 0.0157 | 0.3255 | 175.8472 | 1.0659 | 411.0277 | 0.0461 | -8.39 | -55.2 |
| D1-October                  | 05/10/2015 | 2.1524 | 0.0779 | 12.8714  | 0.0618 | 0.3735 | 233.1769 | 1.551  | 447.5819 | 0.1076 | -7.89 | -53.9 |
| D1-November                 | 11/11/2015 | 1.9444 | <LOD   | 8.5766   | <LOD   | <LOD   | 166.0194 | 0.9639 | 289.5943 | 0.0463 | -     | -     |
| D2-May                      | 02/05/2015 | 2.0546 | <LOD   | 8.6885   | 0.0075 | 0.0072 | 105.1099 | 1.3994 | 452.4271 | 0.0577 | -8.3  | -54.5 |
| D2-October                  | 05/10/2015 | 2.0193 | 0.1355 | 10.9454  | 0.0481 | 0.8146 | 101.4467 | 1.4014 | 445.4105 | 0.0948 | -8.25 | -54.5 |
| D2-November                 | 11/11/2015 | 2.2959 | <LOD   | 9.2494   | <LOD   | <LOD   | 96.6146  | 1.3556 | 372.8549 | 0.0507 | -     | -     |
| L1-May                      | 20/05/2021 | 2.31   | 0.9989 | 2.7453   | 0.6628 | 1.8101 | 5.0889   | 2.9051 | 200.4959 | 1.6799 | -     | -     |
| L1-October                  | 10/10/2020 | 1.1665 | 0.158  | 0.0297   | <LOD   | 1.4891 | 3.6516   | 1.7205 | 164.2097 | 0.7463 | -     | -     |
| Limit of detection<br>(LOD) | -          | 0.0048 | 0.005  | 0.015    | 0.0035 | 0.0071 | 0.0422   | 0.0076 | 0.0919   | 0.0048 | -     | -     |

**Table S4.** Concentration of different metals in the sediment samples (average values of 3 replicates, relative standard deviation <5%).

| Sample Measure unit      | Stratigraphic unit | Li    | V      | Mn     | Co    | Ni    | As    | Rb    | Sr     | U     |
|--------------------------|--------------------|-------|--------|--------|-------|-------|-------|-------|--------|-------|
|                          | -                  | mg/kg | mg/kg  | mg/kg  | mg/kg | mg/kg | mg/kg | mg/kg | mg/kg  | mg/kg |
| SED1-Z12                 | 1                  | 11.7  | 35.1   | 259.92 | 15.25 | 26.98 | 13.68 | 41.87 | 193.82 | 2.39  |
| SED1-Z14                 | 1                  | 19.67 | 61.49  | 318.84 | 9.51  | 52.66 | 22.25 | 47.82 | 174.18 | 3.03  |
| SED1-Z17                 | 2                  | 18.28 | 57     | 318.84 | 8.96  | 48.25 | 8.31  | 21.3  | 94.34  | 2.16  |
| SED1-Z24                 | 3                  | 25.94 | 72.25  | 482.46 | 11.58 | 60.53 | 8.8   | 41.77 | 132.95 | 2.7   |
| SED2-Z56                 | 4                  | 21.8  | 89.46  | 382.44 | 11.55 | 56.02 | 28.36 | 13.75 | 64.7   | 2.36  |
| SED2-Z65                 | 5                  | 33.78 | 104.36 | 575.4  | 15.1  | 73.62 | 24.02 | 52.33 | 185.09 | 2.68  |
| Limit of detection (LOD) | -                  | 0.05  | 0.03   | 0.02   | 0.04  | 0.01  | 0.03  | 0.02  | 0.03   | 0.01  |

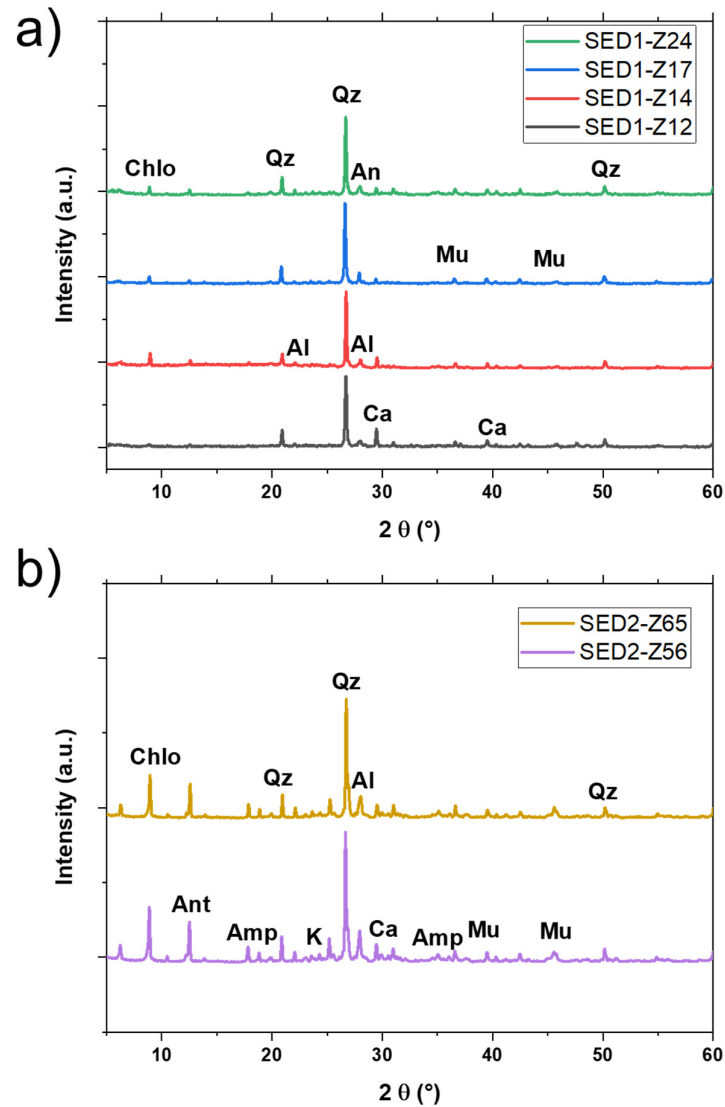

**Figure S1.** XRD spectra of sediment samples collected at different depths in core SED1 (a) and SED2 (b). Major peak patterns of the main minerals present in the samples are indicated by the abbreviations (Qz: quartz; Mu: muscovite; Al: albite; An: anorthite; K: K-feldspars; Amp: amphibole; Ca: calcite; Chlo: chlorite; Ant: antigorite).
